# Supplementary material for: The Effects of Respiratory Training in Parkinson’s Disease: A Systematic Review
Source: PubMed Central journal article supplement — J Parkinsons Dis. 2020 Oct 27;10(4):1315–33. doi: 10.3233/JPD-202223 (PMC7683068; doi:10.3233/jpd-202223), 2020-10-27
Supplement: jpd-10-jpd202223-s001.pdf [file jpd-10-jpd202223-s001.pdf]

# Supplementary Material

## The Effects of Respiratory Training in Parkinson's Disease: A Systematic Review

### Pubmed Literature Search

| Number | Search theme         | Search strategy                                                                                                                                                                                                                                                                                                                                                                                                                                                                                                                                                                                                | Hits   |
|--------|----------------------|----------------------------------------------------------------------------------------------------------------------------------------------------------------------------------------------------------------------------------------------------------------------------------------------------------------------------------------------------------------------------------------------------------------------------------------------------------------------------------------------------------------------------------------------------------------------------------------------------------------|--------|
| 1.     | Parkinson            | "Parkinson Disease"[Mesh] OR "Parkinson Disease, Secondary"[Mesh] OR "Parkinson's disease" OR "Parkinson Disease, Secondary" OR parkinsonism                                                                                                                                                                                                                                                                                                                                                                                                                                                                   | 122771 |
| 2.     | Respiratory training | (((((("Breathing Exercises"[Mesh]) OR "Respiratory Muscles"[Mesh]) OR "Respiratory Function Tests"[Mesh]) OR "Maximal Respiratory Pressures"[Mesh]) OR "Respiratory Therapy"[Mesh] OR respiratory training[tiab] OR deep breathing exercise*[tiab] OR pulmonary reexpansion[tiab] OR respiratory therapy[tiab] OR respiratory function test*[tiab] OR breathing exercise*[tiab] OR respiratory muscle*[tiab] OR maximal respiratory pressure*[tiab]))))                                                                                                                                                        | 341592 |
| 3.     | Combine 1 AND 2      | ("Parkinson Disease"[Mesh] OR "Parkinson Disease, Secondary"[Mesh] OR "Parkinson's disease" OR "Parkinson Disease, Secondary" OR parkinsonism AND AND ((((((("Breathing Exercises"[Mesh]) OR "Respiratory Muscles"[Mesh]) OR "Respiratory Function Tests"[Mesh]) OR "Maximal Respiratory Pressures"[Mesh]) OR "Respiratory Therapy"[Mesh] OR respiratory training[tiab] OR deep breathing exercise*[tiab] OR pulmonary reexpansion[tiab] OR respiratory therapy[tiab] OR respiratory function test*[tiab] OR breathing exercise*[tiab] OR respiratory muscle*[tiab] OR maximal respiratory pressure*[tiab])))) | 487    |
